# Supplementary material
Source: PubMed Central journal article supplement (PMC7566347)

Supplementary Table 1. Hazard ratios for all-cause mortality between five and ten years-postdiagnosis according to calendar year of diagnosis among five-year AYA cancer survivors, stratified by cancer type

| Cancer type                                    | All-cause<br>HR (95% CI)* |
|------------------------------------------------|---------------------------|
| <b>Leukemia<sup>†</sup></b>                    |                           |
| 1975-1984                                      | 1                         |
| 1985-1994                                      | 0.49 (0.40, 0.61)         |
| 1995-2004                                      | 0.23 (0.19, 0.28)         |
| 2005-2011                                      | 0.21 (0.17, 0.26)         |
| p-trend <sup>§</sup>                           | <0.001                    |
| <b>Non-Hodgkin lymphoma<sup>†</sup></b>        |                           |
| 1975-1984                                      | 1                         |
| 1985-1994                                      | 0.69 (0.56, 0.84)         |
| 1995-2004                                      | 0.35 (0.29, 0.43)         |
| 2005-2011                                      | 0.25 (0.20, 0.31)         |
| p-trend <sup>§</sup>                           | <0.001                    |
| <b>Hodgkin lymphoma<sup>†</sup></b>            |                           |
| 1975-1984                                      | 1                         |
| 1985-1994                                      | 0.58 (0.49, 0.70)         |
| 1995-2004                                      | 0.38 (0.32, 0.45)         |
| 2005-2011                                      | 0.29 (0.24, 0.36)         |
| p-trend <sup>§</sup>                           | <0.001                    |
| <b>Central nervous system<sup>†</sup></b>      |                           |
| 1975-1984                                      | 1                         |
| 1985-1994                                      | 0.69 (0.59, 0.81)         |
| 1995-2004                                      | 0.65 (0.57, 0.75)         |
| 2005-2011                                      | 0.64 (0.55, 0.75)         |
| p-trend <sup>§</sup>                           | <0.001                    |
| <b>Osseous and chondromatous<sup>‡</sup></b>   |                           |
| 1975-1984                                      | 1                         |
| 1985-1994                                      | 0.85 (0.56, 1.28)         |
| 1995-2004                                      | 1.00 (0.70, 1.44)         |
| 2005-2011                                      | 0.89 (0.60, 1.32)         |
| p-trend <sup>§</sup>                           | 0.997                     |
| <b>Soft tissue sarcomas<sup>‡</sup></b>        |                           |
| 1975-1984                                      | 1                         |
| 1985-1994                                      | 1.13 (0.85, 1.49)         |
| 1995-2004                                      | 0.96 (0.74, 1.25)         |
| 2005-2011                                      | 0.99 (0.75, 1.32)         |
| p-trend <sup>§</sup>                           | 0.51                      |
| <b>Germ cell and trophoblastic<sup>‡</sup></b> |                           |
| 1975-1984                                      | 1                         |
| 1985-1994                                      | 1.30 (0.95, 1.78)         |

|                                      |                   |
|--------------------------------------|-------------------|
| 1995-2004                            | 0.82 (0.61, 1.12) |
| 2005-2011                            | 1.00 (0.72, 1.39) |
| p-trend <sup>§</sup>                 | 0.07              |
| <b>Melanoma/skin</b> ‡               |                   |
| 1975-1984                            | 1                 |
| 1985-1994                            | 0.77 (0.65, 0.92) |
| 1995-2004                            | 0.52 (0.44, 0.61) |
| 2005-2011                            | 0.55 (0.46, 0.66) |
| p-trend <sup>§</sup>                 | <0.001            |
| <b>Thyroid</b> ‡                     |                   |
| 1975-1984                            | 1                 |
| 1985-1994                            | 0.69 (0.45, 1.06) |
| 1995-2004                            | 0.77 (0.54, 1.10) |
| 2005-2011                            | 0.72 (0.49, 1.05) |
| p-trend <sup>§</sup>                 | 0.21              |
| <b>Head and neck</b> ‡               |                   |
| 1975-1984                            | 1                 |
| 1985-1994                            | 0.97 (0.71, 1.31) |
| 1995-2004                            | 0.72 (0.54, 0.96) |
| 2005-2011                            | 0.55 (0.38, 0.79) |
| p-trend <sup>§</sup>                 | <0.001            |
| <b>Trachea, lung, and bronchus</b> ‡ |                   |
| 1975-1984                            | 1                 |
| 1985-1994                            | 0.63 (0.09, 4.72) |
| 1995-2004                            | 0.51 (0.07, 3.74) |
| 2005-2011                            | 0.50 (0.07, 3.72) |
| p-trend <sup>§</sup>                 | 0.14              |
| <b>Female breast</b> ‡               |                   |
| 1975-1984                            | 1                 |
| 1985-1994                            | 0.82 (0.75, 0.90) |
| 1995-2004                            | 0.69 (0.63, 0.75) |
| 2005-2011                            | 0.55 (0.50, 0.61) |
| p-trend <sup>§</sup>                 | <0.001            |
| <b>Kidney</b> ‡                      |                   |
| 1975-1984                            | 1                 |
| 1985-1994                            | 0.77 (0.48, 1.24) |
| 1995-2004                            | 0.57 (0.37, 0.86) |
| 2005-2011                            | 0.60 (0.39, 0.93) |
| p-trend <sup>§</sup>                 | 0.02              |
| <b>Bladder</b> ‡                     |                   |
| 1975-1984                            | 1                 |
| 1985-1994                            | 0.78 (0.39, 1.55) |
| 1995-2004                            | 1.14 (0.64, 2.03) |

|                        |                   |
|------------------------|-------------------|
| 2005-2011              | 1.46 (0.77, 2.80) |
| p-trend §              | 0.09              |
| <b>Cervix/uterus ‡</b> |                   |
| 1975-1984              | 1                 |
| 1985-1994              | 0.75 (0.58, 0.97) |
| 1995-2004              | 0.81 (0.65, 1.01) |
| 2005-2011              | 0.93 (0.73, 1.19) |
| p-trend §              | 0.95              |
| <b>Colorectal ‡</b>    |                   |
| 1975-1984              | 1                 |
| 1985-1994              | 1.03 (0.79, 1.34) |
| 1995-2004              | 1.00 (0.79, 1.26) |
| 2005-2011              | 1.03 (0.81, 1.30) |
| p-trend §              | 0.70              |

---

\* Hazard ratios estimated from Cox proportional hazards regression models

† Estimates adjusted for sex, age at diagnosis, and race

‡ Estimates adjusted for sex, age at diagnosis, race, and stage

§ P-value from diagnosis year modeled as a continuous variable. All tests were two-sided.

Supplementary Table 2. Cumulative mortality (95% CI) from all causes according to diagnosis year among five-year AYA cancer survivors, stratified by age at diagnosis

| Cancer type                        | Age 15-29         |                   |                   |        | Age 30-39         |                   |                   |        |
|------------------------------------|-------------------|-------------------|-------------------|--------|-------------------|-------------------|-------------------|--------|
|                                    | 5-year            | 10-year           | 20-year           | p *    | 5-year            | 10-year           | 20-year           | p *    |
| <b>Leukemia</b>                    |                   |                   |                   | <0.001 |                   |                   |                   | <0.001 |
| 1975-1984                          | 26.6 (21.8, 31.6) | 33.0 (27.9, 38.3) | 37.3 (31.9, 42.6) |        | 30.9 (25.5, 36.4) | 43.5 (37.5, 49.3) | 57.4 (51.2, 63.1) |        |
| 1985-1994                          | 13.0 (10.4, 16.0) | 17.1 (14.1, 20.3) | 23.6 (20.0, 27.3) |        | 17.6 (14.5, 20.9) | 24.2 (20.7, 27.8) | 38.9 (34.6, 43.1) |        |
| 1995-2004                          | 6.0 (4.9, 7.3)    | 10.2 (8.7, 11.8)  | --                |        | 9.0 (7.7, 10.5)   | 14.8 (13.0, 16.6) | --                |        |
| 2005-2011                          | 6.5 (5.2, 7.9)    |                   |                   |        | 6.7 (5.3, 8.3)    | --                | --                |        |
| <b>Non-Hodgkin lymphoma</b>        |                   |                   |                   | <0.001 |                   |                   |                   | <0.001 |
| 1975-1984                          | 7.3 (5.3, 9.7)    | 12.8 (10.1, 15.8) | 20.6 (17.2, 24.1) |        | 17.1 (14.5, 19.8) | 25.4 (22.3, 28.5) | 40.0 (36.5, 43.5) |        |
| 1985-1994                          | 5.7 (4.3, 7.3)    | 9.8 (8.0, 11.9)   | 16.4 (14.0, 19.1) |        | 11.9 (10.3, 13.7) | 17.8 (15.9, 19.8) | 27.9 (25.6, 30.4) |        |
| 1995-2004                          | 3.4 (2.7, 4.2)    | 6.1 (5.1, 7.3)    | --                |        | 6.2 (5.5, 7.0)    | 10.7 (9.7, 11.8)  | --                |        |
| 2005-2011                          | 2.7 (1.9, 3.8)    | --                | --                |        | 4.3 (3.5, 5.2)    | --                | --                |        |
| <b>Hodgkin lymphoma</b>            |                   |                   |                   | <0.001 |                   |                   |                   | <0.001 |
| 1975-1984                          | 9.0 (7.9, 10.3)   | 14.4 (12.9, 15.9) | 26.5 (24.6, 28.4) |        | 9.1 (7.3, 11.2)   | 17.8 (15.2, 20.5) | 34.4 (31.2, 37.7) |        |
| 1985-1994                          | 4.5 (3.8, 5.4)    | 7.7 (6.7, 8.7)    | 16.5 (15.0, 18.0) |        | 7.3 (6.0, 8.8)    | 13.0 (11.2, 14.8) | 26.5 (24.1, 29.0) |        |
| 1995-2004                          | 3.4 (2.9, 3.9)    | 5.7 (5.0, 6.4)    | --                |        | 4.4 (3.7, 5.2)    | 8.2 (7.1, 9.3)    | --                |        |
| 2005-2011                          | 2.6 (2.0, 3.2)    | --                | --                |        | 3.7 (2.8, 4.9)    | --                | --                |        |
| <b>Central nervous system</b>      |                   |                   |                   | 0.002  |                   |                   |                   | <0.001 |
| 1975-1984                          | 18.9 (15.9, 22.0) | 27.5 (24.1, 31.0) | 39.8 (35.9, 43.6) |        | 33.9 (29.4, 38.3) | 49.5 (44.6, 54.1) | 69.8 (65.2, 73.9) |        |
| 1985-1994                          | 15.2 (13.0, 17.6) | 24.0 (21.3, 26.8) | 36.0 (32.8, 39.1) |        | 24.0 (21.2, 26.8) | 37.4 (34.2, 40.6) | 58.6 (55.0, 61.9) |        |
| 1995-2004                          | 14.5 (13.0, 16.2) | 21.9 (20.0, 23.9) | --                |        | 21.7 (19.8, 23.6) | 34.5 (32.2, 36.8) | --                |        |
| 2005-2011                          | 14.4 (12.4, 16.6) | --                | --                |        | 20.8 (18.2, 23.5) | --                | --                |        |
| <b>Osseous and chondromatous</b>   |                   |                   |                   | 0.63   |                   |                   |                   | 0.53   |
| 1975-1984                          | 9.3 (6.2, 13.2)   | 12.4 (8.7, 16.6)  | 20.3 (15.7, 25.4) |        | 13.3 (7.6, 20.5)  | 19.0 (12.1, 27.0) | 25.6 (17.7, 34.3) |        |
| 1985-1994                          | 9.7 (7.0, 12.9)   | 13.4 (10.2, 17.0) | 17.9 (14.2, 22.0) |        | 7.3 (4.3, 11.4)   | 12.6 (8.5, 17.6)  | 21.8 (16.3, 27.9) |        |
| 1995-2004                          | 10.9 (9.0, 13.1)  | 14.8 (12.4, 17.3) | --                |        | 9.9 (7.3, 12.9)   | 15.8 (12.5, 19.5) | --                |        |
| 2005-2011                          | 10.9 (8.3, 13.8)  | --                | --                |        | 7.9 (4.5, 12.6)   | --                | --                |        |
| <b>Soft tissue sarcomas</b>        |                   |                   |                   | 0.88   |                   |                   |                   | 0.96   |
| 1975-1984                          | 6.1 (4.4, 8.1)    | 8.5 (6.5, 10.8)   | 13.8 (11.2, 16.6) |        | 6.3 (4.6, 8.5)    | 11.2 (8.8, 13.9)  | 21.8 (18.6, 25.2) |        |
| 1985-1994                          | 6.4 (4.9, 8.2)    | 9.3 (7.4, 11.4)   | 14.6 (12.2, 17.2) |        | 8.1 (6.5, 9.8)    | 11.9 (10.0, 13.9) | 19.5 (17.0, 22.1) |        |
| 1995-2004                          | 5.5 (4.4, 6.7)    | 8.6 (7.20, 10.1)  | --                |        | 7.3 (6.2, 8.6)    | 11.9 (10.4, 13.5) | --                |        |
| 2005-2011                          | 6.2 (4.7, 8.0)    | --                | --                |        | 7.8 (6.2, 9.6)    | --                | --                |        |
| <b>Germ cell and trophoblastic</b> |                   |                   |                   | <0.001 |                   |                   |                   | <0.001 |
| 1975-1984                          | 1.7 (1.2, 2.3)    | 4.1 (3.3, 5.1)    | 9.9 (8.7, 11.3)   |        | 1.7 (1.1, 2.6)    | 4.9 (3.9, 6.2)    | 14.9 (13.0, 16.9) |        |
| 1985-1994                          | 1.7 (1.3, 2.2)    | 3.3 (2.6, 4.0)    | 7.4 (6.4, 8.5)    |        | 2.7 (2.2, 3.4)    | 4.8 (4.1, 5.7)    | 11.3 (10.1, 12.6) |        |
| 1995-2004                          | 1.3 (1.1, 1.7)    | 2.6 (2.2, 3.1)    | --                |        | 1.4 (1.2, 1.8)    | 3.5 (3.0, 4.0)    | --                |        |

|                                    |                   |                   |                   |        |                   |                   |                   |        |
|------------------------------------|-------------------|-------------------|-------------------|--------|-------------------|-------------------|-------------------|--------|
| 2005-2011                          | 1.3 (1.0, 1.7)    | --                | --                |        | 2.1 (1.5, 2.7)    | --                | --                |        |
| <b>Melanoma/skin</b>               |                   |                   |                   | <0.001 |                   |                   |                   | <0.001 |
| 1975-1984                          | 5.4 (4.4, 6.5)    | 8.6 (7.3, 9.9)    | 13.1 (11.6, 14.8) |        | 5.6 (4.8, 6.6)    | 9.4 (8.3, 10.5)   | 15.1 (13.8, 16.6) |        |
| 1985-1994                          | 3.4 (2.7, 4.2)    | 6.0 (5.1, 7.0)    | 9.3 (8.1, 10.5)   |        | 4.3 (3.8, 4.9)    | 6.8 (6.1, 7.6)    | 12.2 (11.2, 13.2) |        |
| 1995-2004                          | 2.3 (1.9, 2.7)    | 3.7 (3.2, 4.3)    | --                |        | 3.1 (2.8, 3.5)    | 5.4 (5.0, 5.9)    | --                |        |
| 2005-2011                          | 2.7 (2.1, 3.4)    | --                | --                |        | 3.0 (2.6, 3.6)    | --                | --                |        |
| <b>Thyroid</b>                     |                   |                   |                   | 0.47   |                   |                   |                   | 0.10   |
| 1975-1984                          | 1.1 (0.7, 1.7)    | 1.8 (1.2, 2.5)    | 4.0 (3.1, 5.0)    |        | 1.2 (0.8, 1.8)    | 3.1 (2.4, 4.0)    | 8.3 (7.1, 9.7)    |        |
| 1985-1994                          | 0.7 (0.4, 1.1)    | 1.4 (1.0, 2.0)    | 3.5 (2.7, 4.4)    |        | 1.0 (0.7, 1.4)    | 2.1 (1.6, 2.6)    | 6.4 (5.5, 7.4)    |        |
| 1995-2004                          | 0.7 (0.5, 0.9)    | 1.7 (1.3, 2.1)    | --                |        | 1.0 (0.8, 1.3)    | 2.3 (2.0, 2.7)    | --                |        |
| 2005-2011                          | 0.7 (0.5, 1.1)    | --                | --                |        | 1.0 (0.7, 1.3)    | --                | --                |        |
| <b>Head and neck</b>               |                   |                   |                   | 0.18   |                   |                   |                   | <0.001 |
| 1975-1984                          | 3.0 (1.5, 5.4)    | 7.4 (4.8, 10.8)   | 15.3 (11.5, 19.7) |        | 10.2 (8.0, 12.8)  | 16.6 (13.8, 19.7) | 32.5 (28.8, 36.3) |        |
| 1985-1994                          | 4.8 (3.0, 7.2)    | 8.9 (6.3, 12.0)   | 17.6 (13.8, 21.7) |        | 9.6 (7.8, 11.6)   | 16.6 (14.3, 19.1) | 31.3 (28.2, 34.5) |        |
| 1995-2004                          | 3.9 (2.7, 5.6)    | 5.5 (3.9, 7.5)    | --                |        | 7.3 (6.2, 8.6)    | 12.7 (11.1, 14.4) | --                |        |
| 2005-2011                          | 5.0 (3.1, 7.4)    | --                | --                |        | 6.6 (5.1, 8.5)    | --                | --                |        |
| <b>Trachea, lung, and bronchus</b> |                   |                   |                   | 0.30   |                   |                   |                   | 0.16   |
| 1975-1984                          | 2.4 (0.5, 7.5)    | 4.7 (1.5, 10.8)   | 9.4 (4.4, 16.8)   |        | 18.7 (14.0, 24.0) | 32.3 (26.3, 38.4) | 45.0 (38.4, 51.3) |        |
| 1985-1994                          | 10.7 (5.6, 17.5)  | 13.6 (7.8, 21.0)  | 17.7 (11.0, 25.7) |        | 14.3 (10.7, 18.5) | 19.9 (15.7, 24.6) | 37.6 (31.9, 43.2) |        |
| 1995-2004                          | 4.4 (2.1, 8.2)    | 7.8 (4.3, 12.7)   | --                |        | 14.1 (11.4, 17.2) | 22.2 (18.7, 26.0) | --                |        |
| 2005-2011                          | 3.1 (1.0, 7.2)    | --                | --                |        | 14.6 (11.0, 18.6) | --                | --                |        |
| <b>Female breast</b>               |                   |                   |                   | 0.37   |                   |                   |                   | <0.001 |
| 1975-1984                          | 17.2 (14.3, 20.3) | 23.9 (20.6, 27.4) | 33.7 (29.9, 37.5) |        | 15.8 (14.7, 16.9) | 23.2 (22.0, 24.5) | 33.7 (32.3, 35.1) |        |
| 1985-1994                          | 13.0 (10.5, 15.8) | 20.3 (17.2, 23.5) | 29.7 (26.0, 33.4) |        | 13.1 (12.3, 13.9) | 20.1 (19.1, 21.0) | 30.2 (29.1, 31.3) |        |
| 1995-2004                          | 14.1 (12.3, 16.1) | 21.0 (18.7, 23.3) | --                |        | 11.7 (11.2, 12.2) | 18.4 (17.7, 19.1) | --                |        |
| 2005-2011                          | 13.0 (10.8, 15.4) | --                | --                |        | 9.8 (9.2, 10.5)   | --                | --                |        |
| <b>Kidney</b>                      |                   |                   |                   | 0.85   |                   |                   |                   | <0.001 |
| 1975-1984                          | 4.9 (1.3, 23.4)   | 9.8 (3.9, 18.8)   | 23.6 (13.7, 35.1) |        | 12.3 (8.4, 17.1)  | 18.7 (13.9, 24.2) | 33.0 (26.9, 39.3) |        |
| 1985-1994                          | 3.7 (1.2, 8.6)    | 10.3 (5.5, 17.0)  | 17.9 (11.0, 26.2) |        | 8.0 (5.8, 10.7)   | 15.3 (12.1, 18.7) | 26.2 (22.1, 30.4) |        |
| 1995-2004                          | 3.1 (1.5, 5.7)    | 6.8 (4.0, 10.5)   | --                |        | 5.4 (4.4, 6.7)    | 11.2 (9.6, 13.1)  | --                |        |
| 2005-2011                          | 4.7 (2.2, 8.6)    | --                | --                |        | 4.4 (3.3, 5.7)    | --                | --                |        |
| <b>Bladder</b>                     |                   |                   |                   | 0.39   |                   |                   |                   | 0.19   |
| 1975-1984                          | 1.9 (0.6, 4.5)    | 2.9 (1.2, 5.8)    | 7.7 (4.6, 11.9)   |        | 2.7 (1.5, 4.4)    | 6.0 (4.1, 8.3)    | 13.4 (10.5, 16.6) |        |
| 1985-1994                          | 0.5 (0.1, 2.6)    | 2.6 (1.0, 5.6)    | 7.3 (4.1, 11.8)   |        | 2.3 (1.3, 3.6)    | 5.5 (3.9, 7.4)    | 13.9 (11.3, 16.8) |        |
| 1995-2004                          | 1.1 (0.3, 3.0)    | 2.8 (1.2, 5.5)    | --                |        | 3.5 (2.5, 4.7)    | 7.6 (6.0, 9.4)    | --                |        |
| 2005-2011                          | 3.1 (1.1, 6.8)    | --                | --                |        | 3.9 (2.2, 6.2)    | --                | --                |        |
| <b>Cervix/uterus</b>               |                   |                   |                   | 0.58   |                   |                   |                   | 0.005  |

|                   |                  |                  |                   |      |                  |                   |                   |
|-------------------|------------------|------------------|-------------------|------|------------------|-------------------|-------------------|
| 1975-1984         | 1.7 (1.1, 2.7)   | 3.7 (2.7, 5.1)   | 8.2 (6.6, 10.1)   |      | 4.4 (3.6, 5.3)   | 7.8 (6.8, 9.0)    | 17.7 (16.1, 19.3) |
| 1985-1994         | 2.0 (1.3, 3.0)   | 3.5 (2.4, 4.7)   | 8.1 (6.4, 10.0)   |      | 3.2 (2.7, 3.9)   | 6.2 (5.4, 7.1)    | 14.8 (13.5, 16.1) |
| 1995-2004         | 2.0 (1.4, 2.8)   | 3.2 (2.4, 4.2)   | --                |      | 3.8 (3.3, 4.3)   | 6.8 (6.2, 7.5)    | --                |
| 2005-2011         | 2.1 (1.2, 3.5)   | --               | --                |      | 4.9 (4.2, 5.8)   | --                | --                |
| <b>Colorectal</b> |                  |                  |                   | 0.15 |                  |                   | 0.997             |
| 1975-1984         | 6.8 (4.0, 10.7)  | 11.4 (7.6, 16.0) | 19.3 (14.3, 24.8) |      | 9.9 (7.9, 12.2)  | 13.4 (11.0, 15.9) | 24.0 (21.0, 27.2) |
| 1985-1994         | 8.7 (5.6, 12.5)  | 11.1 (7.6, 15.3) | 18.4 (13.7, 23.7) |      | 10.2 (8.5, 12.0) | 14.4 (12.5, 16.5) | 23.8 (21.3, 26.4) |
| 1995-2004         | 7.4 (5.6, 9.6)   | 11.2 (8.8, 13.8) | --                |      | 10.2 (9.2, 11.3) | 14.9 (13.7, 16.2) | --                |
| 2005-2011         | 10.9 (8.4, 13.9) | --               | --                |      | 10.2 (8.9, 11.5) | --                | --                |

\* P-value from two-sided log-rank test comparing overall survival curves

Supplementary Table 3. Cumulative mortality (95% CI) from the primary cancer and other cancers according to diagnosis year among five-year AYA cancer survivors, stratified by cancer type, age, sex, and race

| Characteristic                     | Primary cancer-specific mortality |                   |                   | p*     | Other cancer mortality |                |                | p*    |
|------------------------------------|-----------------------------------|-------------------|-------------------|--------|------------------------|----------------|----------------|-------|
|                                    | 5-year                            | 10-year           | 20-year           |        | 5-year                 | 10-year        | 20-year        |       |
| <b>Cancer type</b>                 |                                   |                   |                   |        |                        |                |                |       |
| <b>Leukemia</b>                    |                                   |                   |                   | <0.001 |                        |                |                | 0.12  |
| 1975-1984                          | 24.0 (20.6, 27.5)                 | 29.7 (26.0, 33.4) | 33.3 (29.5, 37.2) |        | 1.2 (0.5, 2.4)         | 2.2 (1.3, 3.7) | 3.1 (1.9, 4.8) |       |
| 1985-1994                          | 11.6 (9.8, 13.5)                  | 15.2 (13.2, 17.4) | 19.1 (16.8, 21.6) |        | 0.5 (0.2, 1.0)         | 0.6 (0.3, 1.3) | 2.1 (1.4, 3.2) |       |
| 1995-2004                          | 6.1 (5.3, 6.9)                    | 8.8 (7.8, 9.8)    | --                |        | 0.2 (0.1, 0.4)         | 0.5 (0.3, 0.9) | --             |       |
| 2005-2011                          | 4.7 (3.9, 5.7)                    | --                | --                |        | 0.2 (0.1, 0.5)         | --             | --             |       |
| <b>Non-Hodgkin lymphoma</b>        |                                   |                   |                   | <0.001 |                        |                |                | 0.62  |
| 1975-1984                          | 10.5 (8.9, 12.2)                  | 14.8 (13.0, 16.8) | 20.7 (18.5, 22.9) |        | 0.3 (0.1, 0.8)         | 0.6 (0.3, 1.2) | 2.1 (1.4, 3.0) |       |
| 1985-1994                          | 7.3 (6.3, 8.4)                    | 10.5 (9.3, 11.7)  | 14.0 (12.6, 15.4) |        | 0.3 (0.1, 0.5)         | 0.6 (0.3, 0.9) | 1.6 (1.1, 2.3) |       |
| 1995-2004                          | 3.5 (3.0, 3.9)                    | 5.1 (4.6, 5.7)    | --                |        | 0.3 (0.2, 0.5)         | 0.8 (0.6, 1.0) | --             |       |
| 2005-2011                          | 2.0 (1.6, 2.6)                    | --                | --                |        | 0.2 (0.1, 0.4)         | --             | --             |       |
| <b>Hodgkin lymphoma</b>            |                                   |                   |                   | <0.001 |                        |                |                | 0.001 |
| 1975-1984                          | 6.8 (5.9, 7.7)                    | 10.0 (8.9, 11.1)  | 14.1 (12.9, 15.4) |        | 0.2 (0.1, 0.4)         | 0.7 (0.5, 1.1) | 4.0 (3.3, 4.7) |       |
| 1985-1994                          | 3.5 (3.0, 4.1)                    | 5.2 (4.5, 5.9)    | 7.5 (6.7, 8.4)    |        | 0.3 (0.2, 0.5)         | 0.8 (0.6, 1.1) | 3.2 (2.7, 3.9) |       |
| 1995-2004                          | 2.5 (2.2, 2.9)                    | 3.6 (3.1, 4.0)    | --                |        | 0.2 (0.1, 0.3)         | 0.5 (0.3, 0.7) | --             |       |
| 2005-2011                          | 1.9 (1.5, 2.3)                    | --                | --                |        | 0.2 (0.1, 0.4)         | --             | --             |       |
| <b>Central nervous system</b>      |                                   |                   |                   | <0.001 |                        |                |                | 0.77  |
| 1975-1984                          | 23.2 (20.7, 25.8)                 | 32.3 (29.5, 35.1) | 41.3 (38.3, 44.2) |        | 0.1 (0.0, 0.5)         | 0.5 (0.2, 1.1) | 1.3 (0.8, 2.2) |       |
| 1985-1994                          | 17.5 (15.8, 19.2)                 | 26.4 (24.4, 28.5) | 36.6 (34.3, 38.8) |        | 0.4 (0.2, 0.8)         | 0.6 (0.3, 1.1) | 1.6 (1.1, 2.3) |       |
| 1995-2004                          | 16.4 (15.2, 17.6)                 | 24.9 (23.5, 26.4) | --                |        | 0.2 (0.1, 0.4)         | 0.5 (0.3, 0.8) | --             |       |
| 2005-2011                          | 15.3 (13.8, 16.9)                 | --                | --                |        | 0.3 (0.1, 0.8)         | --             | --             |       |
| <b>Osseous and chondromatous</b>   |                                   |                   |                   | 0.73   |                        |                |                | 0.43  |
| 1975-1984                          | 8.6 (6.0, 11.7)                   | 11.3 (8.3, 14.7)  | 14.0 (10.7, 17.7) |        | 0.5 (0.1, 1.8)         | 0.5 (0.1, 1.8) | 2.4 (1.2, 4.4) |       |
| 1985-1994                          | 8.0 (6.0, 10.4)                   | 11.1 (8.7, 13.8)  | 13.3 (10.6, 16.2) |        | 0.2 (0.0, 0.9)         | 0.7 (0.2, 1.7) | 1.5 (0.7, 2.8) |       |
| 1995-2004                          | 8.7 (7.3, 10.3)                   | 11.4 (9.7, 13.3)  | --                |        | 0.8 (0.4, 1.4)         | 1.3 (0.8, 2.1) | --             |       |
| 2005-2011                          | 8.5 (6.6, 10.8)                   | --                | --                |        | 0.6 (0.2, 1.3)         | --             | --             |       |
| <b>Soft tissue sarcomas</b>        |                                   |                   |                   | 0.38   |                        |                |                | 0.11  |
| 1975-1984                          | 4.8 (3.7, 6.1)                    | 6.3 (5.0, 7.8)    | 9.2 (7.7, 10.9)   |        | 0.4 (0.2, 0.9)         | 1.0 (0.5, 1.7) | 2.7 (1.9, 3.7) |       |
| 1985-1994                          | 5.7 (4.7, 6.9)                    | 7.7 (6.5, 9.0)    | 10.5 (9.1, 12.0)  |        | 0.4 (0.2, 0.8)         | 0.7 (0.4, 1.2) | 2.0 (1.4, 2.7) |       |
| 1995-2004                          | 4.9 (4.2, 5.6)                    | 7.3 (6.4, 8.2)    | --                |        | 0.6 (0.4, 0.9)         | 1.1 (0.8, 1.5) | --             |       |
| 2005-2011                          | 5.8 (4.8, 7.0)                    | --                | --                |        | 0.6 (0.3, 1.2)         | --             | --             |       |
| <b>Germ cell and trophoblastic</b> |                                   |                   |                   | <0.001 |                        |                |                | 0.22  |

|                                    |                   |                    |                   |        |                |                |                |      |
|------------------------------------|-------------------|--------------------|-------------------|--------|----------------|----------------|----------------|------|
| 1975-1984                          | 0.7 (0.5, 1.1)    | 1.5 (1.1, 1.9)     | 3.3 (2.7, 3.9)    |        | 0.1 (0.0, 0.3) | 0.5 (0.3, 0.7) | 2.1 (1.7, 2.7) |      |
| 1985-1994                          | 0.7 (0.5, 1.0)    | 1.1 (0.9, 1.4)     | 1.9 (1.5, 2.3)    |        | 0.2 (0.1, 0.4) | 0.4 (0.2, 0.6) | 1.6 (1.3, 2.0) |      |
| 1995-2004                          | 0.5 (0.3, 0.6)    | 0.9 (0.7, 1.1)     | --                |        | 0.1 (0.1, 0.2) | 0.3 (0.2, 0.5) | --             |      |
| 2005-2011                          | 0.5 (0.3, 0.7)    | --                 | --                |        | 0.3 (0.2, 0.5) | --             | --             |      |
| <b>Melanoma/skin</b>               |                   |                    |                   | <0.001 |                |                |                | 0.04 |
| 1975-1984                          | 4.9 (4.3, 5.6)    | 7.4 (6.6, 8.2)     | 10.1 (9.3, 11.1)  |        | 0.1 (0.1, 0.3) | 0.6 (0.4, 0.8) | 1.8 (1.4, 2.2) |      |
| 1985-1994                          | 3.4 (3.0, 3.8)    | 5.1 (4.6, 5.6)     | 7.0 (6.4, 7.7)    |        | 0.1 (0.1, 0.2) | 0.4 (0.3, 0.5) | 1.3 (1.0, 1.6) |      |
| 1995-2004                          | 2.3 (2.0, 2.5)    | 3.3 (3.0, 3.6)     | --                |        | 0.1 (0.1, 0.2) | 0.3 (0.2, 0.4) | --             |      |
| 2005-2011                          | 2.1 (1.8, 2.5)    | --                 | --                |        | 0.1 (0.1, 0.2) | --             | --             |      |
| <b>Thyroid</b>                     |                   |                    |                   | 0.10   |                |                |                | 0.19 |
| 1975-1984                          | 0.3 (0.1, 0.5)    | 0.5 (0.3, 0.7)     | 1.1 (0.8, 1.5)    |        | 0.4 (0.2, 0.6) | 0.7 (0.5, 1.1) | 2.0 (1.5, 2.4) |      |
| 1985-1994                          | 0.3 (0.2, 0.5)    | 0.6 (0.5, 0.9)     | 1.2 (0.9, 1.5)    |        | 0.2 (0.1, 0.4) | 0.5 (0.3, 0.7) | 1.3 (1.0, 1.7) |      |
| 1995-2004                          | 0.2 (0.2, 0.3)    | 0.4 (0.3, 0.6)     | --                |        | 0.2 (0.1, 0.3) | 0.5 (0.4, 0.6) | --             |      |
| 2005-2011                          | 0.2 (0.1, 0.3)    | --                 | --                |        | 0.2 (0.1, 0.3) | --             | --             |      |
| <b>Head and neck</b>               |                   |                    |                   | 0.03   |                |                |                | 0.10 |
| 1975-1984                          | 5.2 (3.9, 6.8)    | 8.3 (6.6, 10.2)    | 13.2 (11.1, 15.5) |        | 0.3 (0.1, 0.9) | 0.8 (0.4, 1.5) | 3.4 (2.3, 4.7) |      |
| 1985-1994                          | 5.8 (4.6, 7.2)    | 9.5 (8.0, 11.1)    | 14.3 (12.5, 16.3) |        | 0.5 (0.2, 1.1) | 0.8 (0.5, 1.5) | 3.2 (2.3, 4.3) |      |
| 1995-2004                          | 4.5 (3.7, 5.3)    | 6.8 (5.8, 7.9)     | --                |        | 0.1 (0.0, 0.3) | 0.3 (0.1, 0.6) | --             |      |
| 2005-2011                          | 4.4 (3.3, 5.5)    | --                 | --                |        | 0.3 (0.1, 0.8) | --             | --             |      |
| <b>Trachea, lung, and bronchus</b> |                   |                    |                   | 0.94   |                |                |                | 0.34 |
| 1975-1984                          | 10.2 (7.1, 13.8)  | 15.56 (11.8, 19.8) | 18.1 (14.1, 22.6) |        | 0.3 (0.0, 1.7) | 1.3 (0.4, 3.1) | 3.2 (1.6, 5.6) |      |
| 1985-1994                          | 9.3 (6.7, 12.3)   | 12.0 (9.1, 15.3)   | 18.8 (15.1, 22.8) |        | 1.0 (0.3, 2.4) | 1.7 (0.8, 3.4) | 3.2 (1.7, 5.3) |      |
| 1995-2004                          | 9.2 (7.2, 11.4)   | 12.3 (10.0, 14.9)  | --                |        | 0.4 (0.1, 1.1) | 0.6 (0.2, 1.6) | --             |      |
| 2005-2011                          | 9.4 (7.0, 12.3)   | --                 | --                |        | 0.6 (0.2, 1.8) | --             | --             |      |
| <b>Female breast</b>               |                   |                    |                   | <0.001 |                |                |                | 0.04 |
| 1975-1984                          | 14.7 (13.8, 15.7) | 20.7 (19.6, 21.9)  | 26.8 (25.6, 28.0) |        | 0.4 (0.2, 0.6) | 1.0 (0.8, 1.3) | 2.9 (2.5, 3.4) |      |
| 1985-1994                          | 12.3 (11.6, 13.0) | 18.1 (17.2, 18.9)  | 24.5 (23.6, 25.5) |        | 0.3 (0.2, 0.4) | 0.7 (0.6, 1.0) | 2.3 (2.0, 2.7) |      |
| 1995-2004                          | 10.8 (10.3, 11.3) | 16.2 (15.6, 16.8)  | --                |        | 0.2 (0.2, 0.3) | 0.6 (0.5, 0.8) | --             |      |
| 2005-2011                          | 9.2 (8.6, 9.8)    | --                 | --                |        | 0.2 (0.1, 0.3) | --             | --             |      |
| <b>Kidney</b>                      |                   |                    |                   | <0.001 |                |                |                | 0.01 |
| 1975-1984                          | 6.8 (4.2, 10.1)   | 10.7 (7.4, 14.6)   | 16.9 (12.8, 21.5) |        | 0.0 (0.0, 0.0) | 0.0 (0.0, 0.0) | 2.6 (1.1, 5.0) |      |
| 1985-1994                          | 4.8 (3.2, 6.7)    | 8.8 (6.7, 11.4)    | 13.0 (10.3, 16.0) |        | 0.0 (0.0, 0.0) | 0.2 (0.0, 1.0) | 1.5 (0.6, 2.9) |      |
| 1995-2004                          | 2.8 (2.1, 3.7)    | 5.1 (4.0, 6.2)     | --                |        | 0.1 (0.0, 0.4) | 0.7 (0.3, 1.2) | --             |      |
| 2005-2011                          | 2.1 (1.6, 3.4)    | --                 | --                |        | 0.4 (0.2, 1.0) | --             | --             |      |
| <b>Bladder</b>                     |                   |                    |                   | 0.15   |                |                |                | 0.02 |
| 1975-1984                          | 1.7 (0.9, 2.9)    | 2.6 (1.6, 4.0)     | 4.9 (3.5, 6.8)    |        | 0.0 (0.0, 0.0) | 0.4 (0.1, 1.2) | 1.9 (1.1, 3.2) |      |
| 1985-1994                          | 0.9 (0.4, 1.8)    | 1.6 (0.9, 2.7)     | 3.3 (2.2, 4.8)    |        | 0.0 (0.0, 0.0) | 0.6 (0.2, 1.3) | 1.9 (1.1, 3.0) |      |



|                         |                |                   |                   |                  |                |                |                |                  |
|-------------------------|----------------|-------------------|-------------------|------------------|----------------|----------------|----------------|------------------|
| 1995-2004               | 1.3 (0.8, 2.1) | 2.7 (1.9, 3.7)    | --                |                  | 0.3 (0.1, 0.8) | 0.6 (0.3, 1.3) | --             |                  |
| 2005-2011               | 2.3 (1.2, 4.0) | --                | --                |                  | 0.6 (0.2, 1.5) | --             | --             |                  |
| <b>Cervix/uterus</b>    |                |                   |                   | <b>0.08</b>      |                |                |                | <b>0.04</b>      |
| 1975-1984               | 2.1 (1.6, 2.6) | 3.2 (2.7, 3.9)    | 4.8 (4.1, 5.6)    |                  | 0.6 (0.4, 0.9) | 1.3 (0.9, 1.7) | 3.0 (2.4, 3.6) |                  |
| 1985-1994               | 2.0 (1.6, 2.4) | 2.9 (2.4, 3.5)    | 4.4 (3.7, 5.0)    |                  | 0.2 (0.1, 0.4) | 0.7 (0.5, 1.1) | 2.2 (1.8, 2.7) |                  |
| 1995-2004               | 2.1 (1.8, 2.4) | 3.0 (2.6, 3.4)    | --                |                  | 0.3 (0.2, 0.4) | 0.6 (0.4, 0.8) | --             |                  |
| 2005-2011               | 2.8 (2.3, 3.4) | --                | --                |                  | 0.4 (0.2, 0.7) | --             | --             |                  |
| <b>Colorectal</b>       |                |                   |                   | <b>0.43</b>      |                |                |                | <b>0.11</b>      |
| 1975-1984               | 6.9 (5.4, 8.6) | 8.7 (7.0, 10.6)   | 11.9 (9.9, 14.1)  |                  | 0.3 (0.1, 0.9) | 1.0 (0.5, 1.8) | 3.8 (2.7, 5.1) |                  |
| 1985-1994               | 7.7 (6.4, 9.2) | 9.8 (8.3, 11.4)   | 12.4 (10.7, 14.2) |                  | 0.6 (0.3, 1.2) | 1.5 (0.9, 2.2) | 3.5 (2.6, 4.6) |                  |
| 1995-2004               | 7.9 (7.1, 8.8) | 10.3 (9.3, 11.3)  | --                |                  | 0.4 (0.3, 0.7) | 0.9 (0.6, 1.2) | --             |                  |
| 2005-2011               | 8.5 (7.4, 9.6) | --                | --                |                  | 0.3 (0.1, 0.6) |                |                |                  |
| <b>Age at diagnosis</b> |                |                   |                   |                  |                |                |                |                  |
| <b>15-24</b>            |                |                   |                   | <b>&lt;0.001</b> |                |                |                | <b>0.02</b>      |
| 1975-1984               | 4.6 (4.1, 5.1) | 6.4 (5.8, 7.0)    | 9.0 (8.4, 9.7)    |                  | 0.2 (0.1, 0.3) | 0.4 (0.3, 0.6) | 1.5 (1.2, 1.8) |                  |
| 1985-1994               | 3.2 (2.8, 3.6) | 4.8 (4.4, 5.3)    | 6.6 (6.0, 7.1)    |                  | 0.1 (0.1, 0.2) | 0.3 (0.2, 0.5) | 1.2 (1.0, 1.5) |                  |
| 1995-2004               | 2.8 (2.6, 3.1) | 4.1 (3.8, 4.4)    | --                |                  | 0.1 (0.1, 0.2) | 0.3 (0.2, 0.4) | --             |                  |
| 2005-2011               | 3.1 (2.8, 3.4) | --                | --                |                  | 0.1 (0.0, 0.2) | --             | --             |                  |
| <b>25-29</b>            |                |                   |                   | <b>&lt;0.001</b> |                |                |                | <b>&lt;0.001</b> |
| 1975-1984               | 5.7 (5.2, 6.3) | 8.1 (7.4, 8.8)    | 11.1 (10.4, 11.9) |                  | 0.3 (0.2, 0.4) | 0.7 (0.5, 0.9) | 1.9 (1.6, 2.3) |                  |
| 1985-1994               | 4.5 (4.1, 5.0) | 6.6 (6.1, 7.2)    | 8.9 (8.3, 9.6)    |                  | 0.2 (0.1, 0.3) | 0.4 (0.3, 0.6) | 1.5 (1.2, 1.7) |                  |
| 1995-2004               | 3.8 (3.5, 4.0) | 5.5 (5.1, 5.8)    | --                |                  | 0.2 (0.1, 0.2) | 0.3 (0.2, 0.4) | --             |                  |
| 2005-2011               | 3.6 (3.2, 3.9) | --                | --                |                  | 0.1 (0.1, 0.3) | --             | --             |                  |
| <b>30-34</b>            |                |                   |                   | <b>&lt;0.001</b> |                |                |                | <b>&lt;0.001</b> |
| 1975-1984               | 7.0 (6.5, 7.6) | 9.8 (9.2, 10.5)   | 13.2 (12.5, 13.9) |                  | 0.3 (0.2, 0.4) | 0.9 (0.7, 1.1) | 2.7 (2.4, 3.1) |                  |
| 1985-1994               | 5.9 (5.5, 6.3) | 8.7 (8.2, 9.1)    | 11.8 (11.2, 12.3) |                  | 0.3 (0.2, 0.4) | 0.7 (0.5, 0.8) | 2.0 (1.8, 2.3) |                  |
| 1995-2004               | 4.7 (4.5, 5.0) | 7.0 (6.7, 7.4)    | --                |                  | 0.2 (0.1, 0.3) | 0.5 (0.4, 0.6) | --             |                  |
| 2005-2011               | 4.3 (4.0, 4.7) | --                | --                |                  | 0.3 (0.2, 0.4) | --             | --             |                  |
| <b>35-39</b>            |                |                   |                   | <b>&lt;0.001</b> |                |                |                | <b>&lt;0.001</b> |
| 1975-1984               | 8.8 (8.3, 9.4) | 12.7 (12.1, 13.4) | 17.2 (16.5, 18.0) |                  | 0.5 (0.3, 0.6) | 1.1 (0.9, 1.3) | 3.6 (3.2, 3.9) |                  |
| 1985-1994               | 6.9 (6.6, 7.3) | 10.1 (9.7, 10.6)  | 14.1 (13.6, 14.6) |                  | 0.4 (0.3, 0.4) | 0.9 (0.8, 1.0) | 2.6 (2.4, 2.9) |                  |
| 1995-2004               | 5.8 (5.6, 6.0) | 8.7 (8.4, 9.0)    | --                |                  | 0.3 (0.3, 0.4) | 0.8 (0.7, 0.9) | --             |                  |
| 2005-2011               | 4.9 (4.7, 5.3) | --                | --                |                  | 0.4 (0.3, 0.5) | --             | --             |                  |
| <b>Sex</b>              |                |                   |                   |                  |                |                |                |                  |
| <b>Women</b>            |                |                   |                   | <b>&lt;0.001</b> |                |                |                | <b>&lt;0.001</b> |
| 1975-1984               | 7.0 (6.7, 7.4) | 10.1 (9.7, 10.5)  | 13.5 (13.0, 14.0) |                  | 0.4 (0.3, 0.5) | 0.9 (0.8, 1.1) | 2.7 (2.5, 2.9) |                  |
| 1985-1994               | 5.8 (5.5, 6.0) | 8.6 (8.3, 8.9)    | 11.8 (11.4, 12.2) |                  | 0.3 (0.2, 0.3) | 0.7 (0.6, 0.8) | 2.0 (1.8, 2.2) |                  |

|                      |                 |                   |                   |        |                |                |                |        |
|----------------------|-----------------|-------------------|-------------------|--------|----------------|----------------|----------------|--------|
| 1995-2004            | 4.9 (4.8, 5.1)  | 7.4 (7.2, 7.6)    | --                |        | 0.2 (0.2, 0.3) | 0.6 (0.5, 0.6) | --             |        |
| 2005-2011            | 4.3 (4.1, 4.5)  | --                | --                |        | 0.3 (0.2, 0.3) | --             | --             |        |
| <b>Men</b>           |                 |                   |                   | <0.001 |                |                |                | 0.19   |
| 1975-1984            | 6.4 (6.0, 6.9)  | 9.0 (8.5, 9.5)    | 12.6 (12.0, 13.2) |        | 0.2 (0.1, 0.3) | 0.6 (0.5, 0.8) | 2.4 (2.1, 2.7) |        |
| 1985-1994            | 5.3 (5.0, 5.6)  | 7.6 (7.2, 8.0)    | 10.5 (10.1, 11.0) |        | 0.3 (0.2, 0.3) | 0.6 (0.5, 0.7) | 2.1 (1.9, 2.3) |        |
| 1995-2004            | 4.3 (4.1, 4.5)  | 6.2 (6.0, 6.5)    | --                |        | 0.3 (0.2, 0.3) | 0.6 (0.5, 0.6) | --             |        |
| 2005-2011            | 4.0 (3.8, 4.3)  | --                | --                |        | 0.3 (0.2, 0.3) | --             | --             |        |
| <b>Race</b>          |                 |                   |                   |        |                |                |                |        |
| <b>White</b>         |                 |                   |                   | <0.001 |                |                |                | <0.001 |
| 1975-1984            | 6.7 (6.4, 7.0)  | 9.6 (9.2, 9.9)    | 13.0 (12.6, 13.4) |        | 0.3 (0.2, 0.3) | 0.8 (0.7, 0.9) | 2.5 (2.3, 2.7) |        |
| 1985-1994            | 5.3 (5.1, 5.5)  | 7.8 (7.6, 8.1)    | 10.8 (10.5, 11.1) |        | 0.3 (0.2, 0.3) | 0.6 (0.6, 0.7) | 2.0 (1.8, 2.1) |        |
| 1995-2004            | 4.4 (4.3, 4.6)  | 6.6 (6.4, 6.7)    | --                |        | 0.2 (0.2, 0.3) | 0.5 (0.5, 0.6) | --             |        |
| 2005-2011            | 3.9 (3.7, 4.0)  | --                | --                |        | 0.3 (0.2, 0.3) | --             | --             |        |
| <b>Black</b>         |                 |                   |                   | <0.001 |                |                |                | 0.07   |
| 1975-1984            | 8.8 (7.7, 10.0) | 12.2 (10.9, 13.6) | 16.6 (15.1, 18.1) |        | 0.6 (0.4, 1.0) | 1.2 (0.8, 1.7) | 3.6 (2.9, 4.4) |        |
| 1985-1994            | 9.3 (8.4, 10.3) | 13.3 (12.2, 14.4) | 18.0 (16.7, 19.2) |        | 0.4 (0.2, 0.6) | 0.9 (0.7, 1.3) | 2.8 (2.3, 3.4) |        |
| 1995-2004            | 7.4 (6.9, 7.9)  | 10.6 (10.0, 11.3) | --                |        | 0.3 (0.2, 0.5) | 0.8 (0.6, 1.0) | --             |        |
| 2005-2011            | 7.0 (6.3, 7.7)  | --                | --                |        | 0.3 (0.2, 0.6) | --             | --             |        |
| <b>Other/unknown</b> |                 |                   |                   | 0.18   |                |                |                | 0.54   |
| 1975-1984            | 5.3 (4.4, 6.4)  | 8.1 (6.9, 9.4)    | 11.2 (9.8, 12.6)  |        | 0.3 (0.1, 0.7) | 0.6 (0.3, 1.0) | 2.3 (1.7, 3.1) |        |
| 1985-1994            | 5.0 (4.4, 5.7)  | 7.4 (6.6, 8.2)    | 10.5 (9.5, 11.5)  |        | 0.2 (0.1, 0.4) | 0.5 (0.3, 0.8) | 2.0 (1.6, 2.6) |        |
| 1995-2004            | 4.4 (4.0, 4.9)  | 6.9 (6.4, 7.5)    | --                |        | 0.3 (0.2, 0.4) | 0.5 (0.4, 0.7) | --             |        |
| 2005-2011            | 4.3 (3.8, 4.9)  | --                | --                |        | 0.2 (0.1, 0.4) | --             | --             |        |

\* P-value from Gray's test comparing cumulative mortality curves. All tests were two-sided.

Supplementary Table 4. Cumulative mortality (95% CI) from noncancer/nonexternal causes according to diagnosis year among five-year AYA cancer survivors, stratified by cancer type, age, sex, and race

| Characteristic                     | Noncancer/nonexternal mortality |                 |                 | p *    |
|------------------------------------|---------------------------------|-----------------|-----------------|--------|
|                                    | 5-year                          | 10-year         | 20-year         |        |
| <b>Cancer type</b>                 |                                 |                 |                 |        |
| <b>Leukemia</b>                    |                                 |                 |                 | 0.04   |
| 1975-1984                          | 3.3 (2.0, 4.9)                  | 5.2 (3.6, 7.2)  | 8.7 (6.5, 11.1) |        |
| 1985-1994                          | 2.9 (2.0, 4.0)                  | 4.2 (3.1, 5.5)  | 9.1 (7.5, 11.0) |        |
| 1995-2004                          | 1.1 (0.8, 1.5)                  | 2.8 (2.2, 3.5)  | --              |        |
| 2005-2011                          | 1.4 (1.0, 1.9)                  | --              | --              |        |
| <b>Non-Hodgkin lymphoma</b>        |                                 |                 |                 | 0.16   |
| 1975-1984                          | 1.5 (0.9, 2.3)                  | 3.4 (2.45, 4.4) | 7.3 (6.0, 8.8)  |        |
| 1985-1994                          | 1.6 (1.2, 2.2)                  | 3.1 (2.5, 3.9)  | 6.7 (5.7, 7.8)  |        |
| 1995-2004                          | 1.2 (1.0, 1.5)                  | 2.6 (2.2, 3.1)  | --              |        |
| 2005-2011                          | 1.1 (0.8, 1.6)                  | --              | --              |        |
| <b>Hodgkin lymphoma</b>            |                                 |                 |                 | <0.001 |
| 1975-1984                          | 1.7 (1.3, 2.3)                  | 3.9 (3.2, 4.6)  | 9.4 (8.4, 10.5) |        |
| 1985-1994                          | 1.1 (0.8, 1.5)                  | 2.5 (2.1, 3.0)  | 7.5 (6.7, 8.4)  |        |
| 1995-2004                          | 0.8 (0.6, 1.0)                  | 2.0 (1.7, 2.4)  | --              |        |
| 2005-2011                          | 0.6 (0.4, 0.9)                  | --              | --              |        |
| <b>Central nervous system</b>      |                                 |                 |                 | 0.04   |
| 1975-1984                          | 1.5 (0.9, 2.4)                  | 3.0 (2.1, 4.2)  | 7.9 (6.4, 9.6)  |        |
| 1985-1994                          | 1.1 (0.7, 1.7)                  | 2.6 (2.0, 3.4)  | 6.9 (5.7, 8.2)  |        |
| 1995-2004                          | 1.0 (0.7, 1.3)                  | 1.9 (1.5, 2.4)  | --              |        |
| 2005-2011                          | 1.3 (0.8, 1.9)                  | --              | --              |        |
| <b>Osseous and chondromatous</b>   |                                 |                 |                 | 0.55   |
| 1975-1984                          | 1.1 (0.4, 2.6)                  | 1.9 (0.8, 3.7)  | 4.3 (2.6, 6.8)  |        |
| 1985-1994                          | 0.7 (0.2, 1.6)                  | 1.2 (0.5, 2.3)  | 3.7 (2.3, 5.4)  |        |
| 1995-2004                          | 0.8 (0.4, 1.4)                  | 1.5 (0.9, 2.4)  | --              |        |
| 2005-2011                          | 0.6 (0.2, 1.7)                  | --              | --              |        |
| <b>Soft tissue sarcomas</b>        |                                 |                 |                 | 0.43   |
| 1975-1984                          | 0.7 (0.3, 1.2)                  | 1.7 (1.1, 2.6)  | 4.2 (3.2, 5.4)  |        |
| 1985-1994                          | 0.9 (0.6, 1.5)                  | 1.8 (1.2, 2.5)  | 3.7 (2.8, 4.7)  |        |
| 1995-2004                          | 0.8 (0.5, 1.1)                  | 1.4 (1.0, 1.8)  | --              |        |
| 2005-2011                          | 0.5 (0.3, 0.9)                  | --              | --              |        |
| <b>Germ cell and trophoblastic</b> |                                 |                 |                 | <0.001 |
| 1975-1984                          | 0.6 (0.3, 0.9)                  | 1.9 (1.5, 2.4)  | 5.3 (4.6, 6.1)  |        |
| 1985-1994                          | 0.8 (0.6, 1.1)                  | 1.8 (1.5, 2.1)  | 4.3 (3.7, 4.8)  |        |
| 1995-2004                          | 0.4 (0.3, 0.5)                  | 1.1 (0.9, 1.3)  | --              |        |
| 2005-2011                          | 0.5 (0.4, 0.7)                  | --              | --              |        |
| <b>Melanoma/skin</b>               |                                 |                 |                 | 0.49   |
| 1975-1984                          | 0.3 (0.2, 0.5)                  | 0.7 (0.5, 1.0)  | 1.8 (1.5, 2.3)  |        |
| 1985-1994                          | 0.4 (0.2, 0.5)                  | 0.7 (0.5, 0.9)  | 2.1 (1.8, 2.5)  |        |
| 1995-2004                          | 0.3 (0.2, 0.4)                  | 0.8 (0.6, 0.9)  | --              |        |
| 2005-2011                          | 0.4 (0.3, 0.6)                  | --              | --              |        |
| <b>Thyroid</b>                     |                                 |                 |                 | 0.07   |
| 1975-1984                          | 0.4 (0.3, 0.7)                  | 0.9 (0.7, 1.3)  | 2.6 (2.1, 3.2)  |        |
| 1985-1994                          | 0.2 (0.1, 0.4)                  | 0.5 (0.3, 0.7)  | 2.3 (1.8, 2.7)  |        |

|                                    |                 |                |                  |        |
|------------------------------------|-----------------|----------------|------------------|--------|
| 1995-2004                          | 0.3 (0.3, 0.5)  | 0.9 (0.8, 1.1) | --               |        |
| 2005-2011                          | 0.2 (0.1, 0.4)  | --             | --               |        |
| <b>Head and neck</b>               |                 |                |                  | 0.08   |
| 1975-1984                          | 1.8 (1.1, 2.8)  | 4.0 (2.8, 5.4) | 8.7 (7.0, 10.6)  |        |
| 1985-1994                          | 1.1 (0.7, 1.8)  | 3.0 (2.2, 4.1) | 7.6 (6.1, 9.2)   |        |
| 1995-2004                          | 1.4 (1.0, 1.9)  | 2.8 (2.1, 3.5) | --               |        |
| 2005-2011                          | 1.0 (0.5, 1.8)  | --             | --               |        |
| <b>Trachea, lung, and bronchus</b> |                 |                |                  | 0.22   |
| 1975-1984                          | 2.9 (1.4, 5.2)  | 6.4 (4.0, 9.4) | 11.2 (8.0, 14.9) |        |
| 1985-1994                          | 2.4 (1.3, 4.3)  | 3.4 (2.0, 5.5) | 9.1 (6.5, 12.3)  |        |
| 1995-2004                          | 1.8 (1.0, 3.0)  | 4.0 (2.7, 5.7) | --               |        |
| 2005-2011                          | 0.8 (0.3, 1.8)  | --             | --               |        |
| <b>Female breast</b>               |                 |                |                  | <0.001 |
| 1975-1984                          | 0.7 (0.5, 0.9)  | 1.2 (0.9, 1.6) | 3.5 (3.0, 4.0)   |        |
| 1985-1994                          | 0.5 (0.4, 0.7)  | 1.1 (0.9, 1.3) | 2.9 (2.5, 3.3)   |        |
| 1995-2004                          | 0.7 (0.6, 0.9)  | 1.5 (1.3, 1.7) | --               |        |
| 2005-2011                          | 0.6 (0.4, 0.7)  | --             | --               |        |
| <b>Kidney</b>                      |                 |                |                  | 0.49   |
| 1975-1984                          | 3.2 (1.6, 5.78) | 5.0 (2.9, 8.0) | 9.8 (6.6, 13.6)  |        |
| 1985-1994                          | 1.9 (1.0, 3.3)  | 4.3 (2.8, 6.1) | 8.1 (6.0, 10.6)  |        |
| 1995-2004                          | 1.9 (1.3, 2.6)  | 3.9 (3.0, 5.0) | --               |        |
| 2005-2011                          | 1.4 (0.9, 2.1)  | --             | --               |        |
| <b>Bladder</b>                     |                 |                |                  | 0.26   |
| 1975-1984                          | 0.6 (0.2, 1.4)  | 1.7 (1.0, 2.9) | 3.9 (2.7, 5.6)   |        |
| 1985-1994                          | 0.5 (0.2, 1.1)  | 1.8 (1.0, 2.8) | 5.4 (4.0, 7.2)   |        |
| 1995-2004                          | 0.9 (0.5, 1.5)  | 2.1 (1.4, 3.1) | --               |        |
| 2005-2011                          | 0.1 (0.0, 0.6)  | --             | --               |        |
| <b>Cervix/uterus</b>               |                 |                |                  | 0.29   |
| 1975-1984                          | 0.8 (0.5, 1.1)  | 1.7 (1.3, 2.2) | 6.3 (5.5, 7.2)   |        |
| 1985-1994                          | 0.7 (0.4, 0.9)  | 1.5 (1.1, 1.9) | 5.7 (4.9, 6.5)   |        |
| 1995-2004                          | 0.9 (0.7, 1.1)  | 2.0 (1.6, 2.3) | --               |        |
| 2005-2011                          | 1.1 (0.7, 1.5)  | --             | --               |        |
| <b>Colorectal</b>                  |                 |                |                  | 0.61   |
| 1975-1984                          | 1.7 (1.0, 2.7)  | 2.7 (1.8, 3.8) | 6.6 (5.2, 8.4)   |        |
| 1985-1994                          | 1.4 (0.9, 2.1)  | 2.3 (1.6, 3.2) | 6.1 (4.9, 7.5)   |        |
| 1995-2004                          | 1.1 (0.8, 1.4)  | 2.2 (1.8, 2.8) | --               |        |
| 2005-2011                          | 1.2 (0.8, 1.7)  | --             | --               |        |
| <b>Age at diagnosis</b>            |                 |                |                  |        |
| <b>15-24</b>                       |                 |                |                  | <0.001 |
| 1975-1984                          | 0.7 (0.5, 0.9)  | 1.4 (1.1, 1.7) | 3.6 (3.2, 4.1)   |        |
| 1985-1994                          | 0.6 (0.4, 0.7)  | 1.1 (0.9, 1.3) | 2.9 (2.5, 3.3)   |        |
| 1995-2004                          | 0.5 (0.4, 0.6)  | 0.9 (0.8, 1.1) | --               |        |
| 2005-2011                          | 0.6 (0.5, 0.8)  | --             | --               |        |
| <b>25-29</b>                       |                 |                |                  | 0.003  |
| 1975-1984                          | 0.8 (0.6, 1.0)  | 1.7 (1.4, 2.0) | 4.3 (3.8, 4.8)   |        |
| 1985-1994                          | 0.7 (0.5, 0.9)  | 1.5 (1.2, 1.7) | 3.8 (3.4, 4.2)   |        |
| 1995-2004                          | 0.5 (0.4, 0.6)  | 1.2 (1.0, 1.4) | --               |        |
| 2005-2011                          | 0.5 (0.4, 0.7)  | --             | --               |        |
| <b>30-34</b>                       |                 |                |                  | <0.001 |

|                      |                |                |                  |        |
|----------------------|----------------|----------------|------------------|--------|
| 1975-1984            | 0.9 (0.7, 1.1) | 2.0 (1.7, 2.3) | 5.0 (4.6, 5.5)   |        |
| 1985-1994            | 0.7 (0.6, 0.9) | 1.6 (1.4, 1.8) | 4.3 (3.9, 4.7)   |        |
| 1995-2004            | 0.7 (0.6, 0.8) | 1.5 (1.4, 1.7) | --               |        |
| 2005-2011            | 0.6 (0.4, 0.7) | --             | --               |        |
| <b>35-39</b>         |                |                |                  | 0.003  |
| 1975-1984            | 1.2 (1.0, 1.5) | 2.7 (2.4, 3.0) | 6.8 (6.3, 7.3)   |        |
| 1985-1994            | 1.1 (1.0, 1.3) | 2.2 (2.0, 2.4) | 6.0 (5.6, 6.4)   |        |
| 1995-2004            | 1.0 (1.0, 1.1) | 2.3 (2.1, 2.5) | --               |        |
| 2005-2011            | 1.0 (0.8, 1.1) | --             | --               |        |
| <b>Sex</b>           |                |                |                  |        |
| <b>Women</b>         |                |                |                  | 0.006  |
| 1975-1984            | 0.8 (0.7, 0.9) | 1.6 (1.4, 1.7) | 4.2 (4.0, 4.5)   |        |
| 1985-1994            | 0.7 (0.6, 0.8) | 1.3 (1.2, 1.5) | 3.8 (3.6, 4.0)   |        |
| 1995-2004            | 0.7 (0.6, 0.7) | 1.5 (1.4, 1.6) | --               |        |
| 2005-2011            | 0.6 (0.5, 0.7) | --             | --               |        |
| <b>Men</b>           |                |                |                  | <0.001 |
| 1975-1984            | 1.2 (1.1, 1.5) | 2.8 (2.6, 3.2) | 6.7 (6.2, 7.2)   |        |
| 1985-1994            | 1.2 (1.0, 1.3) | 2.4 (2.2, 2.6) | 5.9 (5.6, 6.3)   |        |
| 1995-2004            | 0.9 (0.8, 1.0) | 2.0 (1.9, 2.2) | --               |        |
| 2005-2011            | 0.9 (0.7, 1.0) | --             | --               |        |
| <b>Race</b>          |                |                |                  |        |
| <b>White</b>         |                |                |                  | <0.001 |
| 1975-1984            | 0.8 (0.7, 0.9) | 1.8 (1.6, 2.0) | 4.7 (4.4, 4.9)   |        |
| 1985-1994            | 0.8 (0.7, 0.9) | 1.6 (1.5, 1.7) | 4.2 (4.0, 4.4)   |        |
| 1995-2004            | 0.7 (0.6, 0.7) | 1.5 (1.5, 1.6) | --               |        |
| 2005-2011            | 0.7 (0.6, 0.8) | --             | --               |        |
| <b>Black</b>         |                |                |                  | 0.05   |
| 1975-1984            | 2.3 (1.7, 2.9) | 4.5 (3.7, 5.4) | 10.3 (9.1, 11.5) |        |
| 1985-1994            | 1.8 (1.4, 2.2) | 3.5 (3.0, 4.2) | 9.2 (8.2, 10.2)  |        |
| 1995-2004            | 1.5 (1.3, 1.8) | 3.2 (2.8, 3.6) | --               |        |
| 2005-2011            | 1.4 (1.1, 1.7) | --             | --               |        |
| <b>Other/unknown</b> |                |                |                  | <0.001 |
| 1975-1984            | 1.2 (0.8, 1.8) | 2.3 (1.7, 3.1) | 5.8 (4.8, 6.9)   |        |
| 1985-1994            | 0.7 (0.5, 1.0) | 1.7 (1.3, 2.1) | 4.4 (3.7, 5.1)   |        |
| 1995-2004            | 0.6 (0.5, 0.8) | 1.4 (1.2, 1.7) | --               |        |
| 2005-2011            | 0.4 (0.3, 0.6) | --             | --               |        |

\* P-value from Gray's test comparing cumulative mortality curves. All tests were two-sided.

Supplementary Table 5. Hazard ratios for mortality between five and ten years-postdiagnosis according to calendar year of diagnosis among five-year AYA cancer survivors, stratified by cancer type

| Cancer type                          | Primary cancer<br>sHR (95% CI)* | Other cancer<br>sHR (95% CI)* | Noncancer/nonexternal<br>sHR (95% CI)* |
|--------------------------------------|---------------------------------|-------------------------------|----------------------------------------|
| <b>Leukemia †</b>                    |                                 |                               |                                        |
| 1975-1984                            | 1                               | 1                             | 1                                      |
| 1985-1994                            | 0.44 (0.35, 0.56)               | 0.37 (0.12, 1.17)             | 0.85 (0.48, 1.50)                      |
| 1995-2004                            | 0.22 (0.18, 0.28)               | 0.13 (0.04, 0.41)             | 0.31 (0.17, 0.54)                      |
| 2005-2011                            | 0.18 (0.14, 0.22)               | 0.15 (0.04, 0.50)             | 0.48 (0.27, 0.83)                      |
| p-trend §                            | <0.001                          | <0.001                        | <0.001                                 |
| <b>Non-Hodgkin lymphoma †</b>        |                                 |                               |                                        |
| 1975-1984                            | 1                               | 1                             | 1                                      |
| 1985-1994                            | 0.65 (0.52, 0.82)               | 0.78 (0.22, 2.75)             | 1.05 (0.60, 1.82)                      |
| 1995-2004                            | 0.29 (0.23, 0.36)               | 1.02 (0.35, 3.00)             | 0.74 (0.44, 1.23)                      |
| 2005-2011                            | 0.18 (0.14, 0.24)               | 0.66 (0.19, 2.28)             | 0.57 (0.32, 1.03)                      |
| p-trend §                            | <0.001                          | 0.53                          | 0.007                                  |
| <b>Hodgkin lymphoma †</b>            |                                 |                               |                                        |
| 1975-1984                            | 1                               | 1                             | 1                                      |
| 1985-1994                            | 0.50 (0.40, 0.62)               | 1.44 (0.51, 4.07)             | 0.62 (0.42, 0.93)                      |
| 1995-2004                            | 0.34 (0.28, 0.42)               | 0.75 (0.26, 2.17)             | 0.41 (0.28, 0.60)                      |
| 2005-2011                            | 0.25 (0.19, 0.32)               | 0.92 (0.30, 2.87)             | 0.33 (0.21, 0.52)                      |
| p-trend §                            | <0.001                          | 0.32                          | <0.001                                 |
| <b>Central nervous system †</b>      |                                 |                               |                                        |
| 1975-1984                            | 1                               | 1                             | 1                                      |
| 1985-1994                            | 0.67 (0.57, 0.79)               | 3.83 (0.47, 31.45)            | 0.68 (0.35, 1.31)                      |
| 1995-2004                            | 0.63 (0.55, 0.74)               | 1.80 (0.23, 14.46)            | 0.57 (0.32, 1.04)                      |
| 2005-2011                            | 0.61 (0.52, 0.72)               | 1.57 (0.16, 15.64)            | 0.62 (0.33, 1.19)                      |
| p-trend §                            | <0.001                          | 0.71                          | 0.15                                   |
| <b>Osseous and chondromatous ‡</b>   |                                 |                               |                                        |
| 1975-1984                            | 1                               | 1                             | 1                                      |
| 1985-1994                            | 0.95 (0.61, 1.50)               | 0.28 (0.03, 3.19)             | 0.56 (0.14, 2.26)                      |
| 1995-2004                            | 1.02 (0.68, 1.52)               | 1.35 (0.28, 6.40)             | 0.65 (0.20, 2.10)                      |
| 2005-2011                            | 0.91 (0.59, 1.39)               | 1.21 (0.23, 6.50)             | 0.33 (0.07, 1.63)                      |
| p-trend §                            | 0.80                            | 0.45                          | 0.33                                   |
| <b>Soft tissue sarcomas ‡</b>        |                                 |                               |                                        |
| 1975-1984                            | 1                               | 1                             | 1                                      |
| 1985-1994                            | 1.12 (0.82, 1.54)               | 0.88 (0.28, 2.76)             | 1.25 (0.54, 2.92)                      |
| 1995-2004                            | 0.91 (0.68, 1.22)               | 1.30 (0.49, 3.46)             | 1.09 (0.49, 2.41)                      |
| 2005-2011                            | 1.01 (0.73, 1.39)               | 1.16 (0.38, 3.49)             | 0.72 (0.29, 1.80)                      |
| p-trend §                            | 0.48                            | 0.60                          | 0.76                                   |
| <b>Germ cell and trophoblastic ‡</b> |                                 |                               |                                        |
| 1975-1984                            | 1                               | 1                             | 1                                      |
| 1985-1994                            | 1.09 (0.66, 1.80)               | 2.32 (0.66, 8.14)             | 1.44 (0.83, 2.48)                      |
| 1995-2004                            | 0.69 (0.42, 1.13)               | 1.25 (0.36, 4.37)             | 0.71 (0.41, 1.23)                      |
| 2005-2011                            | 0.71 (0.41, 1.21)               | 2.64 (0.74, 9.42)             | 1.00 (0.57, 1.76)                      |
| p-trend §                            | 0.04                            | 0.48                          | 0.05                                   |
| <b>Melanoma/skin ‡</b>               |                                 |                               |                                        |
| 1975-1984                            | 1                               | 1                             | 1                                      |

|                                      |                   |                   |                   |
|--------------------------------------|-------------------|-------------------|-------------------|
| 1985-1994                            | 0.75 (0.62, 0.90) | 0.80 (0.28, 2.31) | 1.14 (0.58, 2.24) |
| 1995-2004                            | 0.47 (0.39, 0.56) | 0.82 (0.32, 2.09) | 0.86 (0.46, 1.61) |
| 2005-2011                            | 0.46 (0.38, 0.57) | 0.87 (0.31, 2.39) | 1.36 (0.70, 2.63) |
| p-trend §                            | <0.001            | 0.60              | 0.62              |
| <b>Thyroid ‡</b>                     |                   |                   |                   |
| 1975-1984                            | 1                 | 1                 | 1                 |
| 1985-1994                            | 0.91 (0.40, 2.07) | 0.56 (0.25, 1.26) | 0.53 (0.25, 1.13) |
| 1995-2004                            | 0.81 (0.39, 1.67) | 0.44 (0.22, 0.89) | 0.77 (0.43, 1.39) |
| 2005-2011                            | 0.62 (0.28, 1.36) | 0.46 (0.22, 0.97) | 0.50 (0.25, 0.98) |
| p-trend §                            | 0.35              | 0.03              | 0.26              |
| <b>Head and neck ‡</b>               |                   |                   |                   |
| 1975-1984                            | 1                 | 1                 | 1                 |
| 1985-1994                            | 1.03 (0.71, 1.49) | 1.34 (0.34, 5.27) | 0.64 (0.31, 1.32) |
| 1995-2004                            | 0.74 (0.52, 1.05) | 0.30 (0.06, 1.51) | 0.75 (0.41, 1.39) |
| 2005-2011                            | 0.58 (0.38, 0.89) | 0.72 (0.15, 3.41) | 0.31 (0.12, 0.84) |
| p-trend §                            | 0.001             | 0.14              | 0.06              |
| <b>Trachea, lung, and bronchus ‡</b> |                   |                   |                   |
| 1975-1984                            | 1                 | 1                 | 1                 |
| 1985-1994                            | 0.38 (0.07, 2.16) | NC                | NC                |
| 1995-2004                            | 0.35 (0.06, 1.96) | NC                | NC                |
| 2005-2011                            | 0.36 (0.06, 2.01) | NC                | NC                |
| p-trend §                            | 0.42              | NC                | NC                |
| <b>Female breast ‡</b>               |                   |                   |                   |
| 1975-1984                            | 1                 | 1                 | 1                 |
| 1985-1994                            | 0.83 (0.75, 0.91) | 0.68 (0.36, 1.28) | 0.72 (0.46, 1.15) |
| 1995-2004                            | 0.67 (0.61, 0.73) | 0.54 (0.31, 0.96) | 1.01 (0.69, 1.48) |
| 2005-2011                            | 0.54 (0.49, 0.59) | 0.44 (0.22, 0.87) | 0.75 (0.49, 1.16) |
| p-trend §                            | <0.001            | 0.003             | 0.65              |
| <b>Kidney ‡</b>                      |                   |                   |                   |
| 1975-1984                            | 1                 | 1                 | 1                 |
| 1985-1994                            | 0.91 (0.49, 1.71) | NC                | 0.56 (0.23, 1.38) |
| 1995-2004                            | 0.58 (0.33, 1.02) | NC                | 0.53 (0.25, 1.12) |
| 2005-2011                            | 0.61 (0.34, 1.10) | NC                | 0.44 (0.20, 0.97) |
| p-trend §                            | 0.03              | NC                | 0.33              |
| <b>Bladder ‡</b>                     |                   |                   |                   |
| 1975-1984                            | 1                 | 1                 | 1                 |
| 1985-1994                            | 0.54 (0.22, 1.32) | NC                | 0.89 (0.21, 3.79) |
| 1995-2004                            | 0.68 (0.33, 1.42) | NC                | 1.39 (0.42, 4.58) |
| 2005-2011                            | 1.10 (0.49, 2.47) | NC                | 0.29 (0.04, 2.37) |
| p-trend §                            | 0.67              | NC                | 0.93              |
| <b>Cervix/uterus ‡</b>               |                   |                   |                   |
| 1975-1984                            | 1                 | 1                 | 1                 |
| 1985-1994                            | 0.88 (0.63, 1.22) | 0.31 (0.14, 0.71) | 0.76 (0.44, 1.30) |
| 1995-2004                            | 0.84 (0.63, 1.12) | 0.40 (0.21, 0.75) | 0.97 (0.61, 1.54) |
| 2005-2011                            | 1.01 (0.74, 1.38) | 0.49 (0.23, 1.04) | 0.97 (0.57, 1.64) |
| p-trend §                            | 0.93              | 0.07              | 0.67              |
| <b>Colorectal ‡</b>                  |                   |                   |                   |
| 1975-1984                            | 1                 | 1                 | 1                 |

|                      |                   |                   |                   |
|----------------------|-------------------|-------------------|-------------------|
| 1985-1994            | 1.06 (0.78, 1.44) | 1.82 (0.48, 6.88) | 0.77 (0.40, 1.48) |
| 1995-2004            | 1.07 (0.82, 1.40) | 1.24 (0.36, 4.27) | 0.57 (0.32, 1.01) |
| 2005-2011            | 1.08 (0.82, 1.42) | 0.81 (0.20, 3.28) | 0.61 (0.33, 1.13) |
| p-trend <sup>§</sup> | 0.58              | 0.40              | 0.16              |

---

Abbreviations: NC, not calculated due to small number of events

\* Subdistribution hazard ratios estimated from Fine and Gray models

† Estimates adjusted for sex, age at diagnosis, race

‡ Estimates adjusted for sex, age at diagnosis, race, and stage

§ P-value from diagnosis year modeled as a continuous variable. All tests were two-sided.



Supplemental Figure 1. Cumulative mortality from all causes among five-year AYA survivors of selected cancers. a) Osseous and chondromatous neoplasms, b) Germ cell and trophoblastic neoplasms, c) Soft tissue sarcomas, d) Thyroid cancer, e) Head and neck cancers, f) Trachea, lung, and bronchus cancers, g) Kidney cancer, h) Bladder cancer

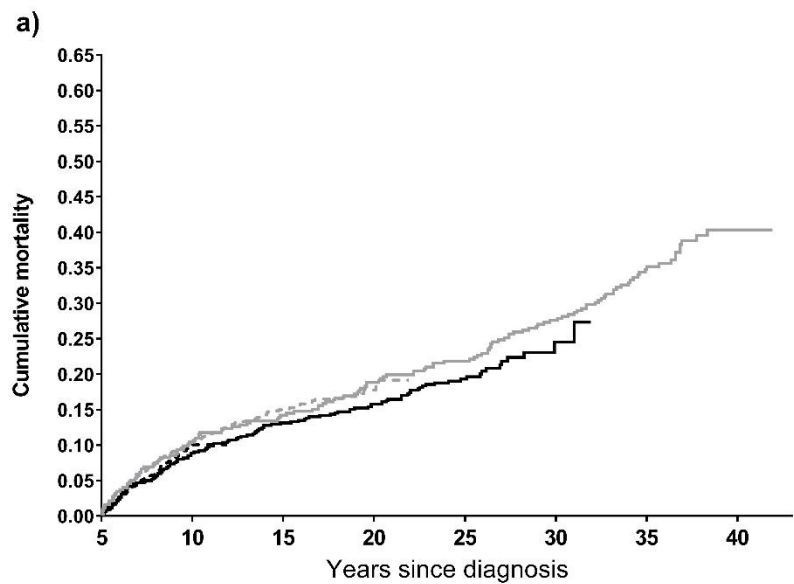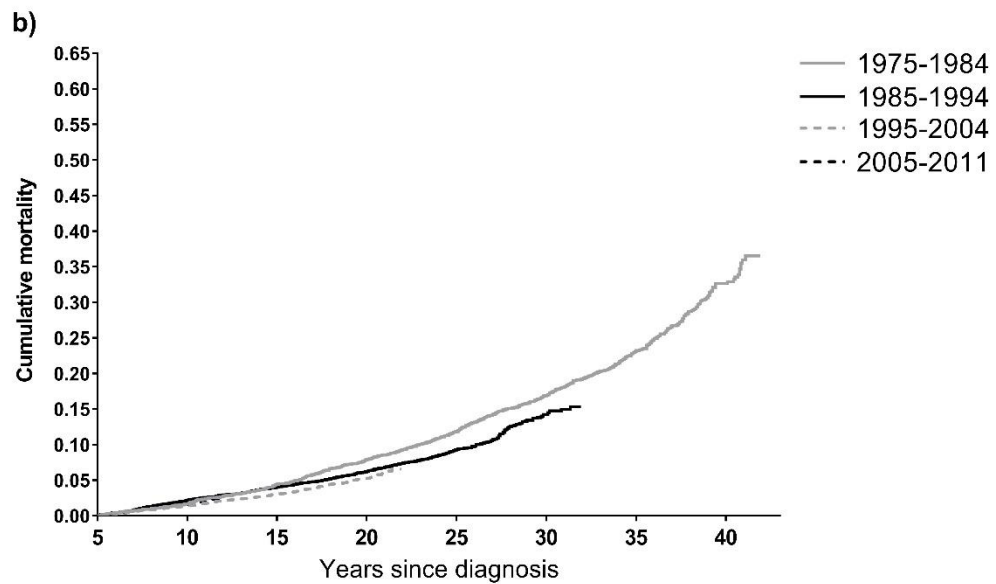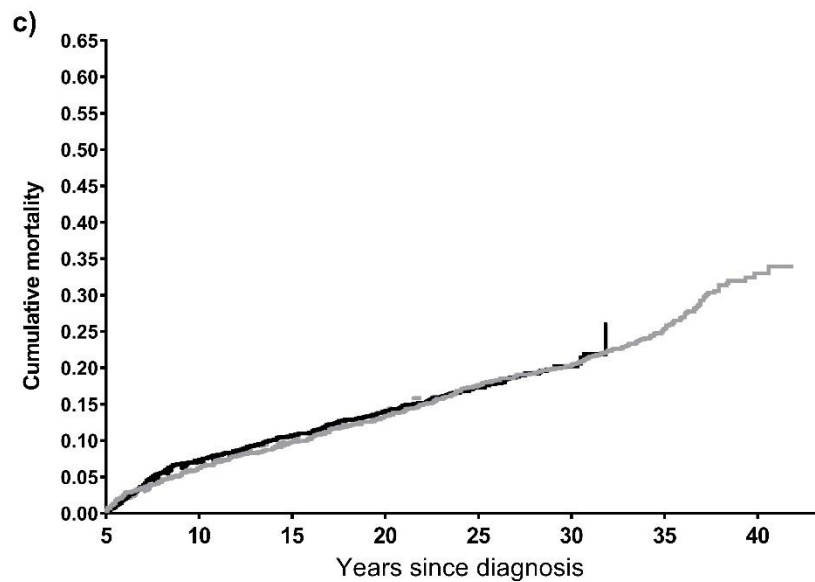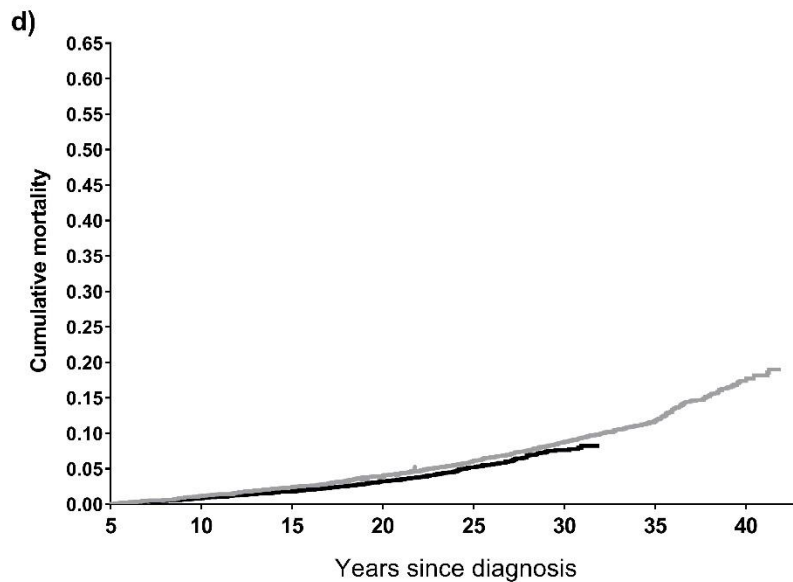

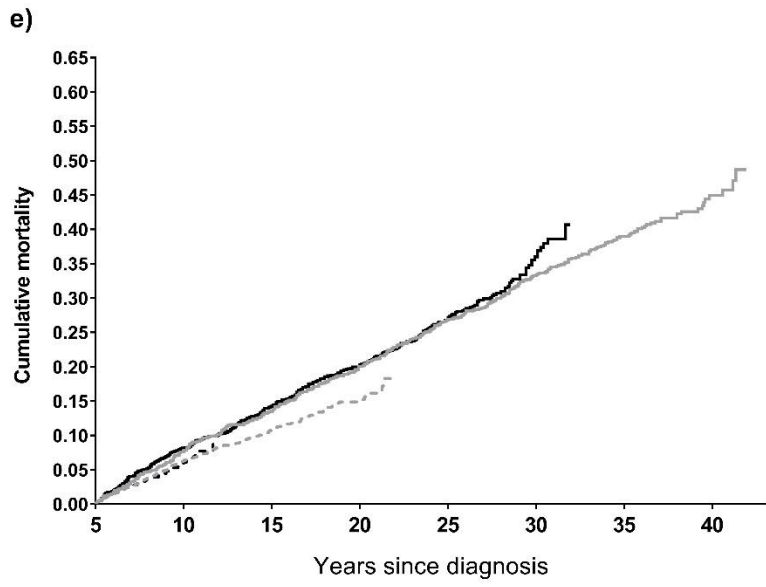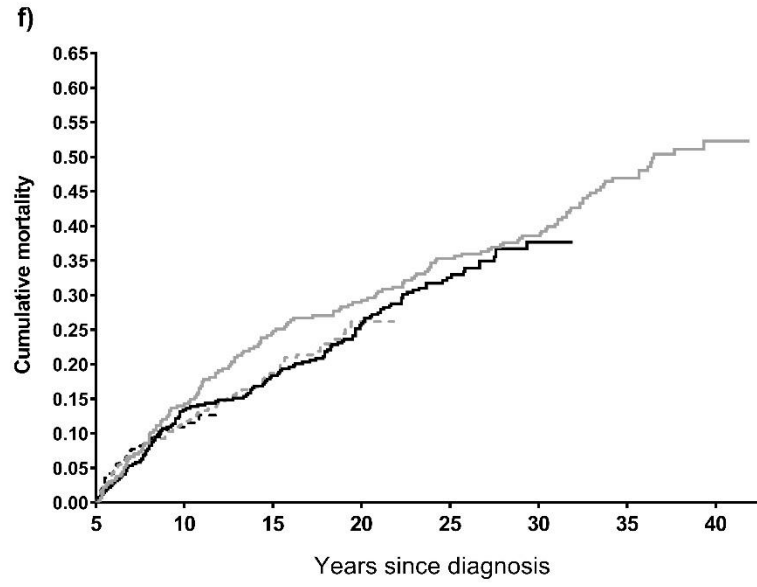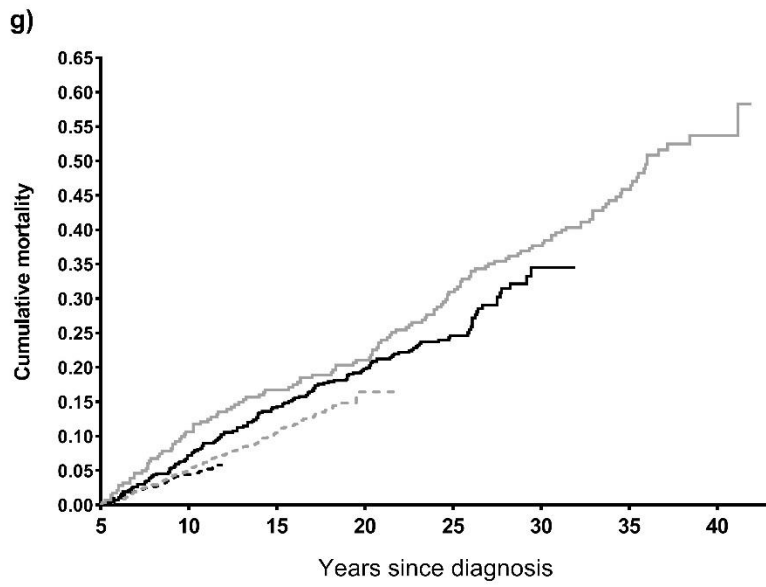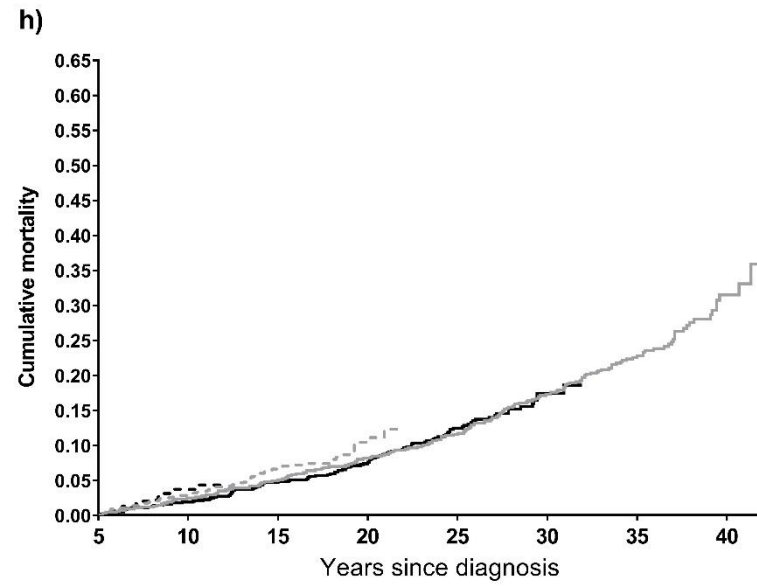

Supplement: djaa014_supplementary_data.pdf [file djaa014_supplementary_data.pdf]
